# Supplementary material for: Dimensional Analysis of Gas Holdup of Venturi Carbonation Reactor for Red Mud Processing
Source: Hindawi journal article supplement (doi:10.1155/2020/6973165), 2020-06-30
Supplement: f1 [file 6973165.f1.docx]

**Dimensional analysis of gas holdup of** **Venturi carbonation reactor for red mud processing**

Yibin Xiao,1 Yan Liu,1 Zhibin Zhao,2 Ting’an Zhang,1 and Ruibing Li,3

1School of Metallurgy, Northeastern University, Shenyang 110819, China

2Shenyang Aluminium and Magnesium Engineering and Research Institute (SAMI), Shenyang 110001, china

3School of mechanical and Power Engineering, Shenyang University of Chemical Technology, Shenyang 110142, China

**Supplementary Materials**

Figures S1: Fitting coefficient *a*1, *a*2, *a*3, and *a*4 as obtained according to the slopes: (a) *a*1; (b) *a*2; (c, d) *a*3; (e) *a*4.


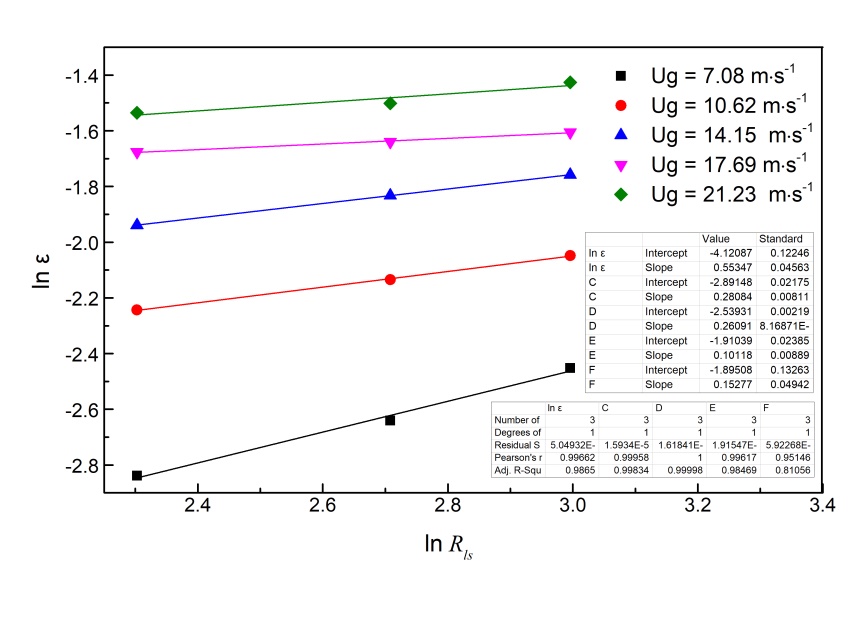


(a)


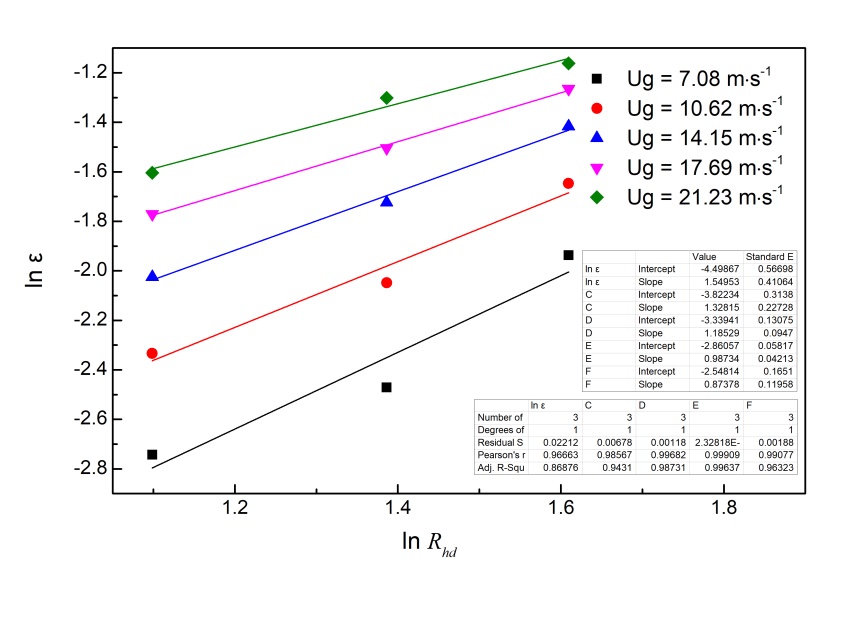


(b)


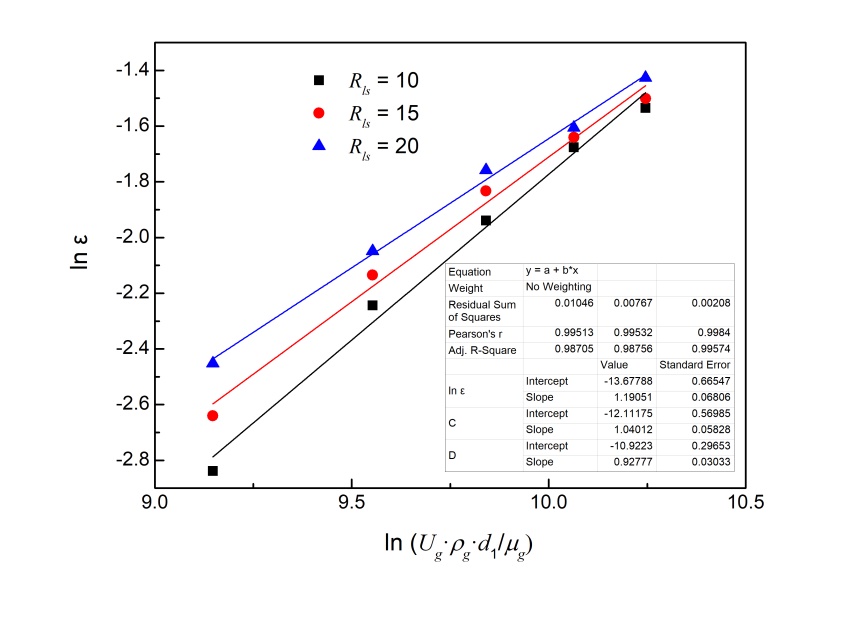


(c)


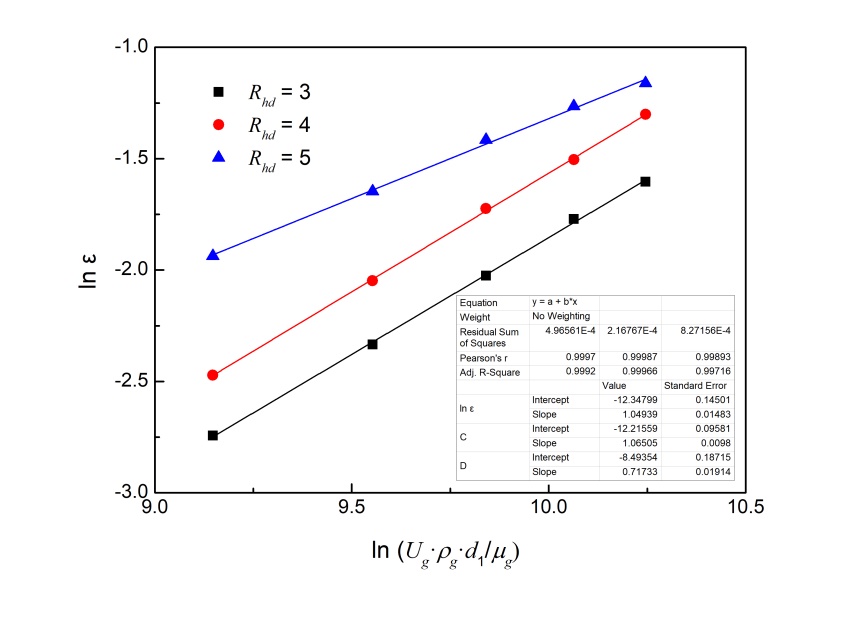


(d)


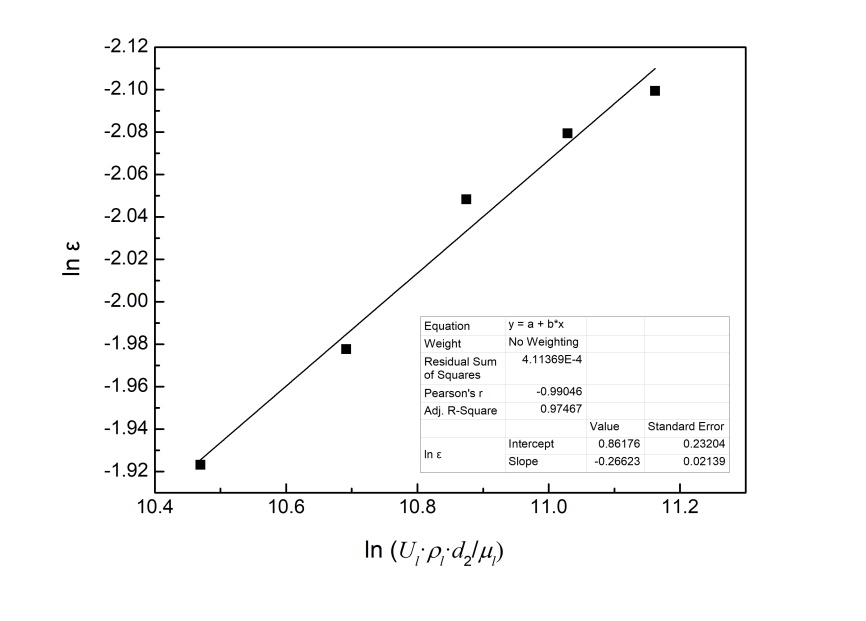


(e)

Table S2: Mean statistical variance of the results presented in Figures S1.

| *Ug* | ln ε vs ln *Rls* | ln ε vs ln *Rhd* | *Rls* | ln ε vs ln *Ug* | *Rhd* | ln ε vs ln *Ug* | ln ε vs ln *Ul* |
| --- | --- | --- | --- | --- | --- | --- | --- |
| Adj.R-Square | Adj.R-Square | Adj.R-Square | Adj.R-Square | Adj.R-Square |
|  | （i) | （ii) |  | （iii) |  | （iv) | （v) |
| 7.08 | 0.9865 | 0.86876 | 10 | 0.98705 | 3 | 0.9992 | 0.97467 |
| 10.62 | 0.99834 | 0.9431 | 15 | 0.98756 | 4 | 0.99966 |  |
| 14.15 | 0.99998 | 0.98731 | 20 | 0.99574 | 5 | 0.99716 |  |
| 17.69 | 0.98469 | 0.99637 |  |  |  |  |  |
| 21.23 | 0.81056 | 0.96323 |  |  |  |  |  |

* The first and second columns are obtained from Figures S1 (a); First and third columns are obtained from Figures S1 (b); fourth and fifth columns are obtained from Figures S1 (c); sixth and seventh columns are obtained from Figures S1 (d); eighth column is obtained from Figures S1 (e).

Table S3: Relative error between the calculated and experimental results.

| *Rhd* *Ug* | 7.08 | 10.62 | 14.15 | 17.69 | 21.23 |
| --- | --- | --- | --- | --- | --- |
| 3 | 7.7 | 8.2 | 10.1 | 13.0 | 11.6 |
| 4 | 1.1 | 2.9 | 6.5 | 6.2 | 8.1 |
| 5 | 24.6 | 15.3 | 10.5 | 3.9 | -4.1 |
| *Ul* | 0.89 | 1.11 | 1.33 | 1.55 | 1.77 |
|  | 5.9 | 6.3 | 4.3 | 5.2 | 6.7 |
| *Rls* *Ug* | 7.08 | 10.62 | 14.15 | 17.69 | 21.23 |
| 10 | 15.5 | -2.2 | -4.0 | -8.3 | -3.9 |
| 15 | 7.7 | -2.2 | -3.7 | -0.6 | 3.6 |
| 20 | -3.0 | -2.9 | -3.3 | 3.8 | 4.0 |

* The relative error: δ =（Xi-Xc）/ Xt x 100, Xi is experimental value, Xc is calculated value. The mean relative error: , where σ = 8.7%.
